# Supplementary material
Source: Springer Nature journal article supplement (https://www.springermedizin.de/resource/supplementary/12879_2012_2263_MOESM4_ESM.pdf/9443794)

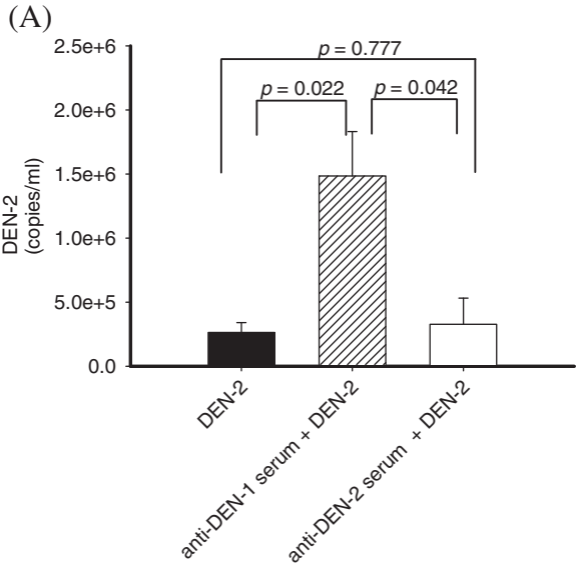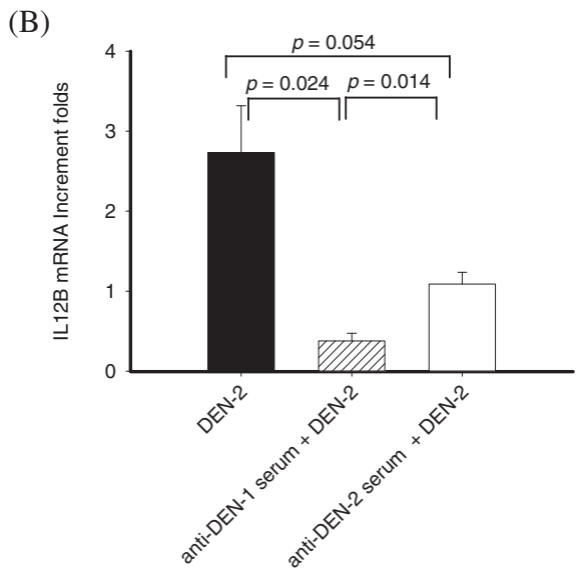

Supplement: MOESM4 [file 9443794]
